# Supplementary material
Source: PubMed Central journal article supplement (PMC7185884)
Supplement: NIHMS1579722-supplement-P450cam_SI.pdf [file NIHMS1579722-supplement-P450cam_SI.pdf]

**Supporting Information:**

**An intermediate conformational state of  
cytochrome P450cam-CN in complex with  
putidaredoxin**

1

Shih-Wei Chuo, Lee-Ping Wang, R. David Britt, and David B. Goodin\*

*Department of Chemistry, University of California, Davis, One Shields Avenue, Davis,  
California 95616*

E-mail: [dbgoodin@ucdavis.edu](mailto:dbgoodin@ucdavis.edu)

## 2 Supporting Information Available

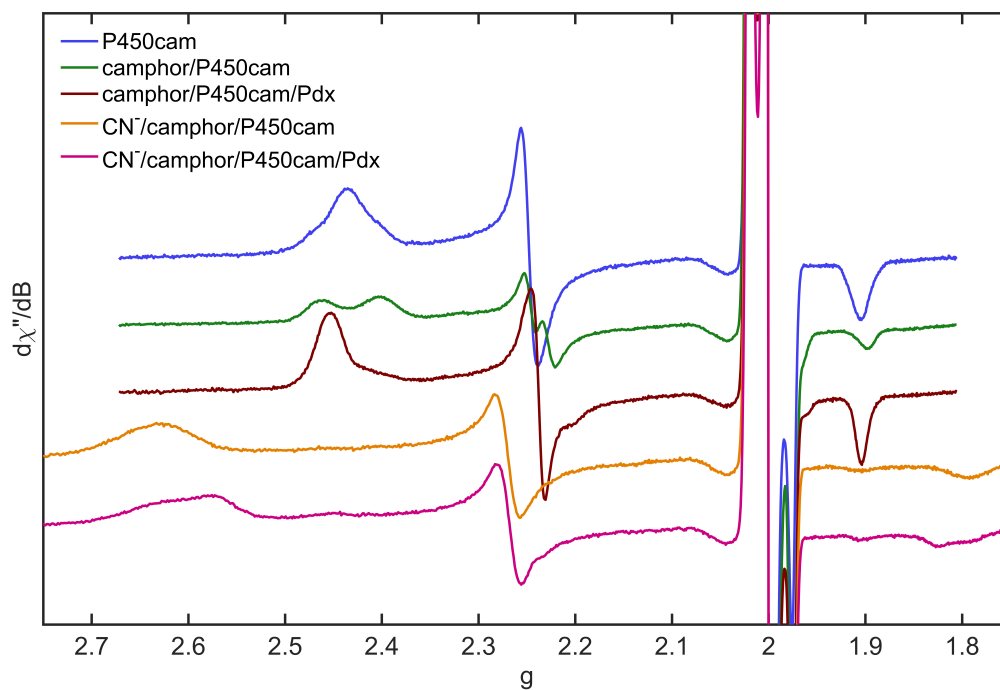

Figure S1: CW X-band EPR spectra in the low-spin region for 4MT-labeled ferric P450cam in different states, P450cam (blue), camphor/P450cam (green), camphor/P450cam/Pdx (brown), CN<sup>-</sup>/camphor/P450cam (orange), and CN<sup>-</sup>/camphor/P450cam/Pdx (magenta) complexes, at 50K and 0.2 mW microwave power.

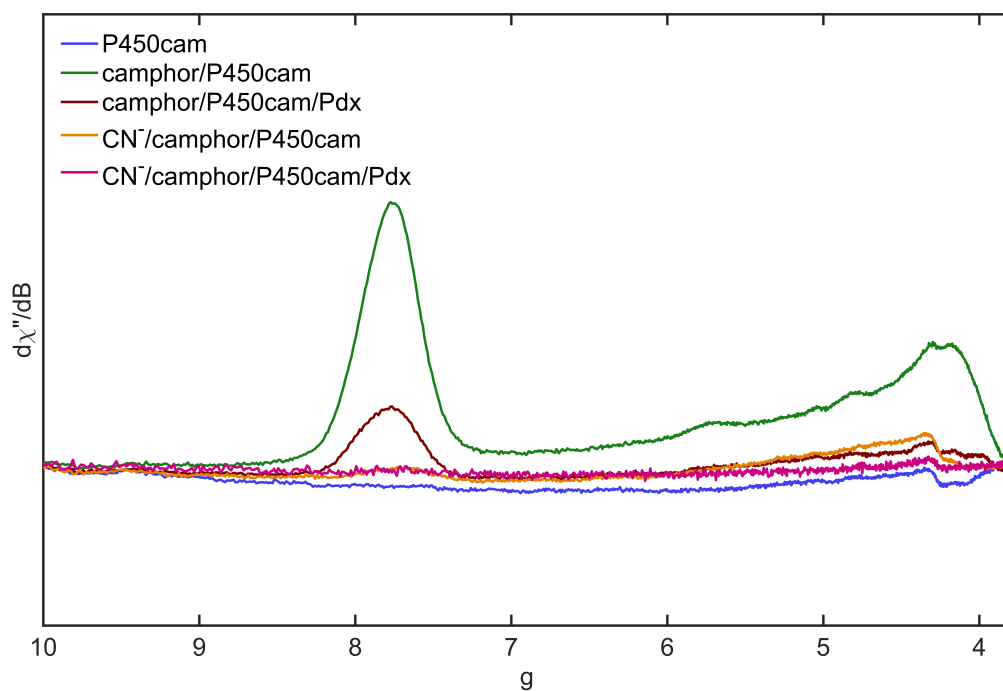

Figure S2: CW X-band EPR spectra in the high-spin region for 4MT-labeled ferric P450cam in different states, P450cam (blue), camphor/P450cam (green), camphor/P450cam/Pdx (brown),  $\text{CN}^-$ /camphor/P450cam (orange), and  $\text{CN}^-$ /camphor/P450cam/Pdx (magenta) complexes, at 15K and 2.0 mW microwave power.

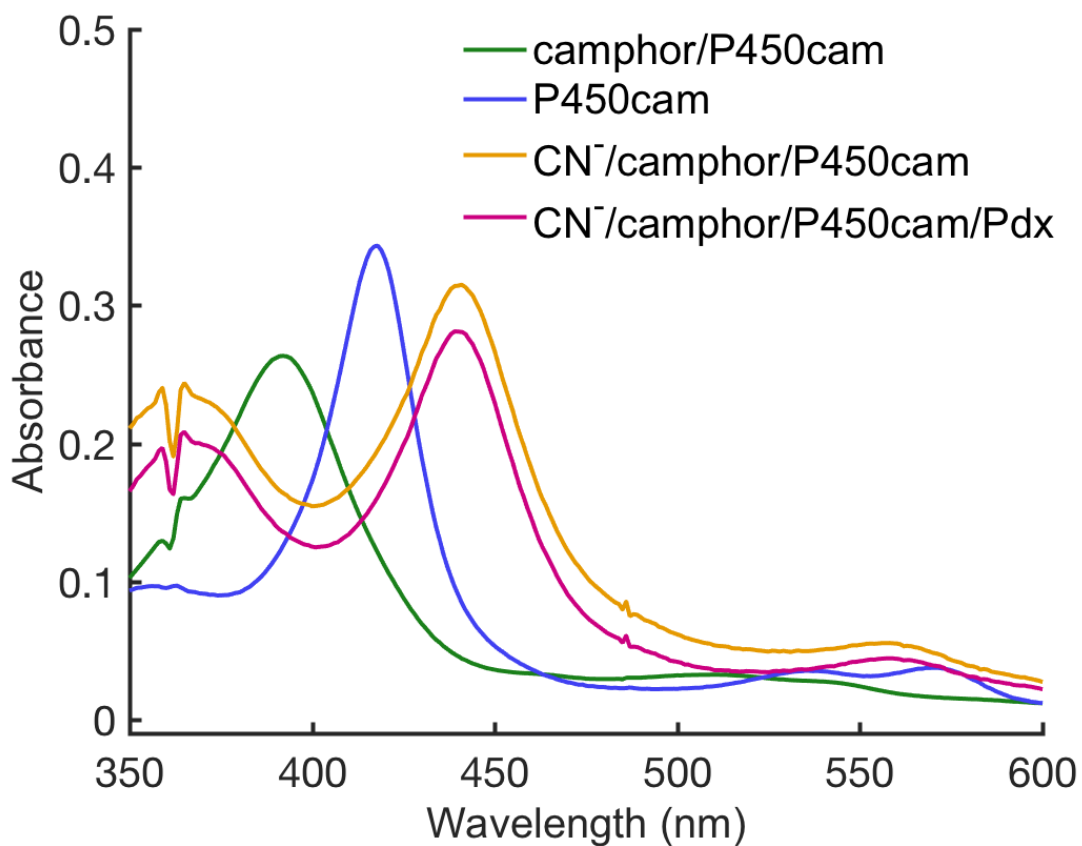

Figure S3: UV/Vis spectra at 25 °C of 4MT-labeled ferric P450cam for camphor/P450cam (green), P450cam (blue), CN<sup>-</sup>/camphor/P450cam (orange), and CN<sup>-</sup>/camphor/P450cam/Pdx (magenta) complexes.

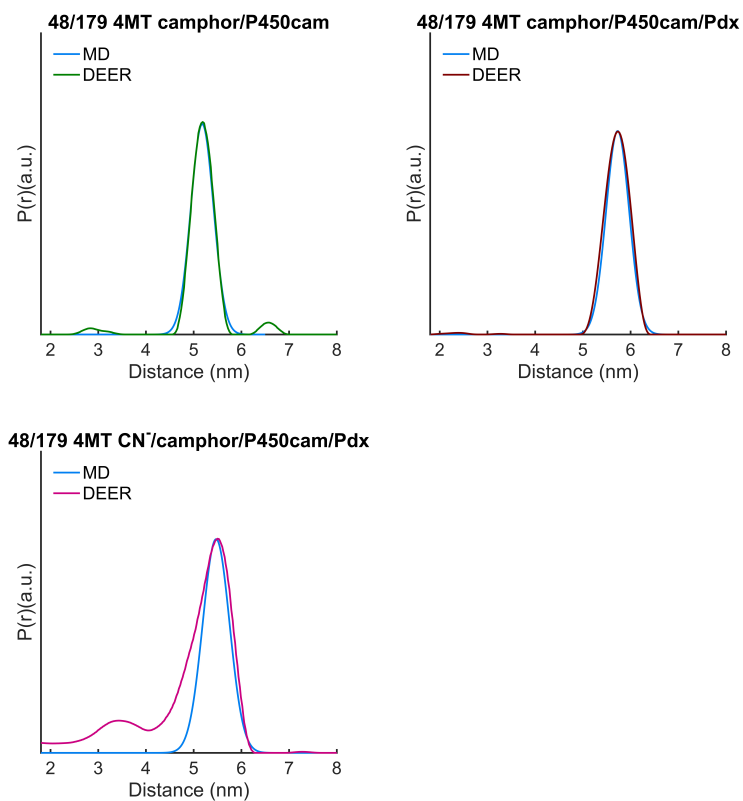

Figure S4: Comparison of distance distributions predicted by MD (blue) with the observed DEER distributions for spin-labeled forms of camphor/P450cam (green), camphor/P450cam/Pdx (brown), and CN<sup>-</sup>/camphor/P450cam/Pdx (magenta) complexes. The MD distance was calculated between the nitroxide nitrogen atoms of the 4MT labels.

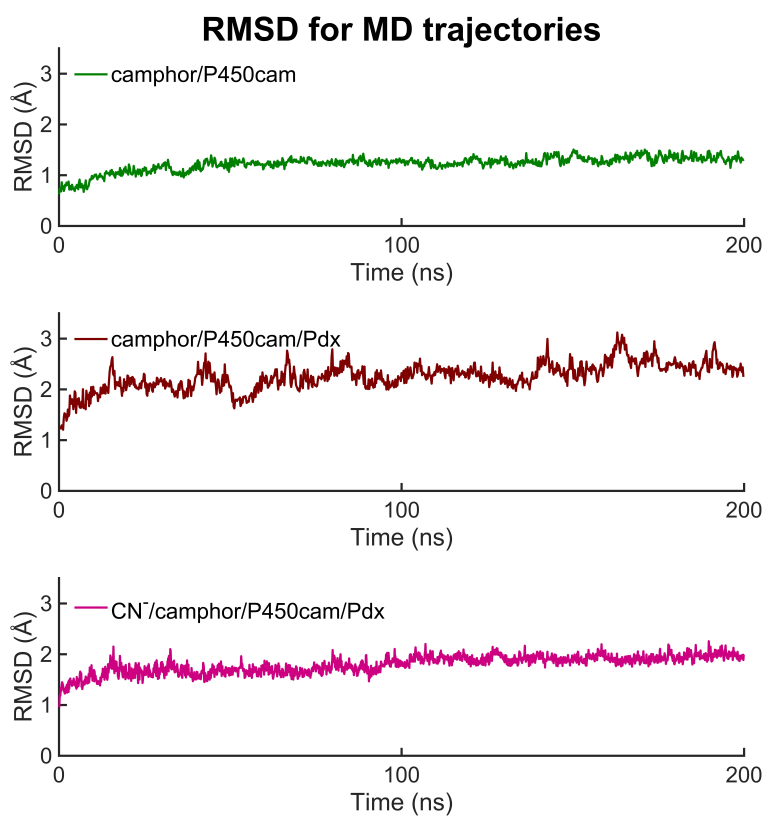

Figure S5: RMSD for 200ns MD trajectories of ferric camphor/P450cam (green), camphor/P450cam/Pdx (brown), and CN<sup>-</sup>/camphor/P450cam/Pdx (magenta) complexes.

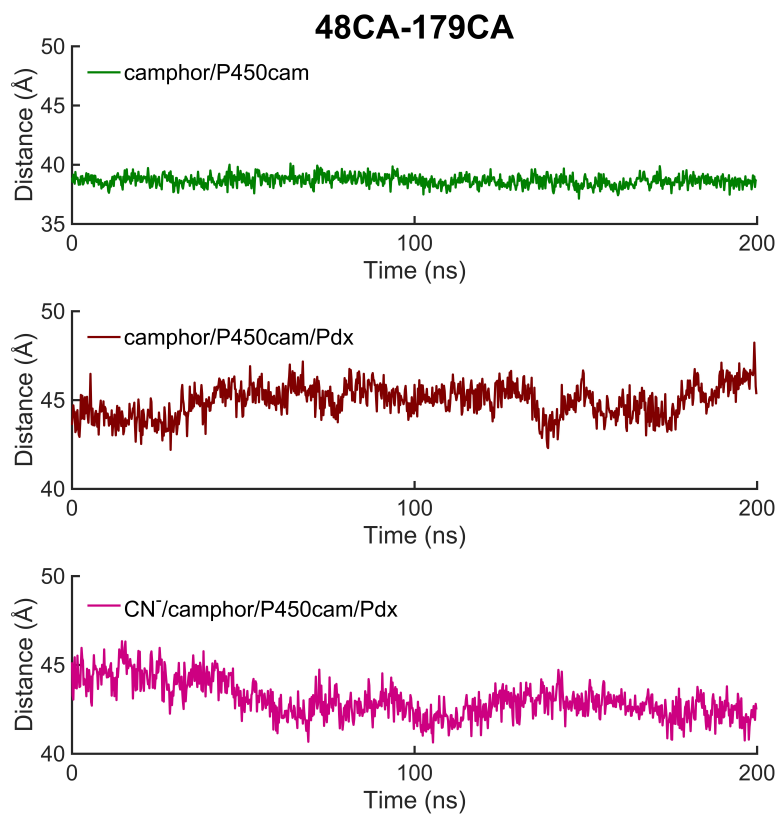

Figure S6: Time evolution from MD trajectories for the distance between the  $\alpha$  carbons of the 4MT labeled residues, Ser48 and Tyr179, for camphor/P450cam (green), camphor/P450cam/Pdx (brown), and CN<sup>-</sup>/camphor/P450cam/Pdx (magenta) complexes.

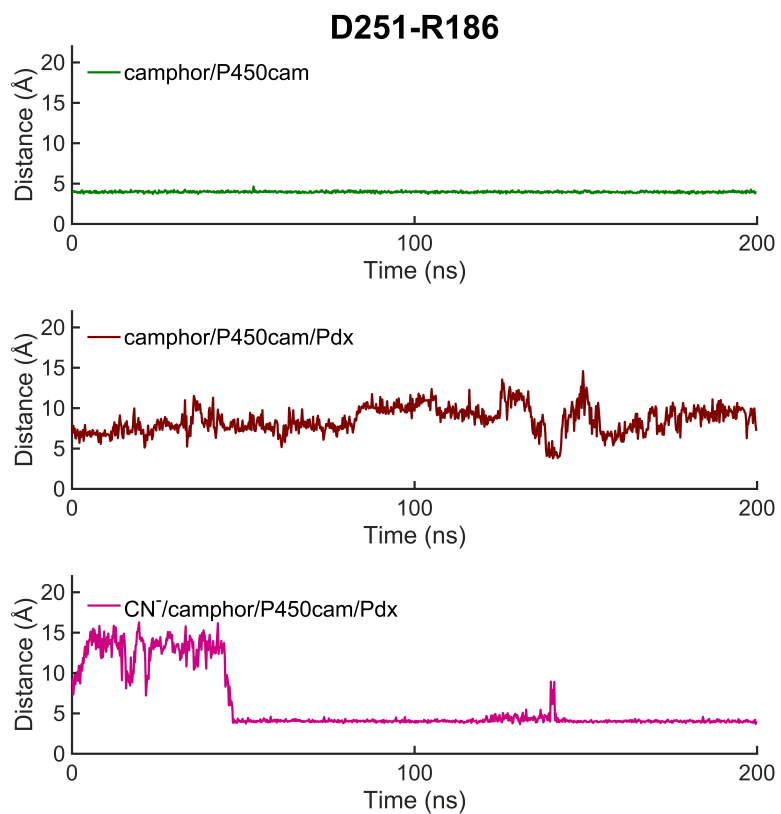

Figure S7: Time evolution from MD trajectories for the distance between Asp251 CG and Arg186 NZ for camphor/P450cam (green), camphor/P450cam/Pdx (brown), and CN<sup>-</sup>/camphor/P450cam/Pdx (magenta) complexes.



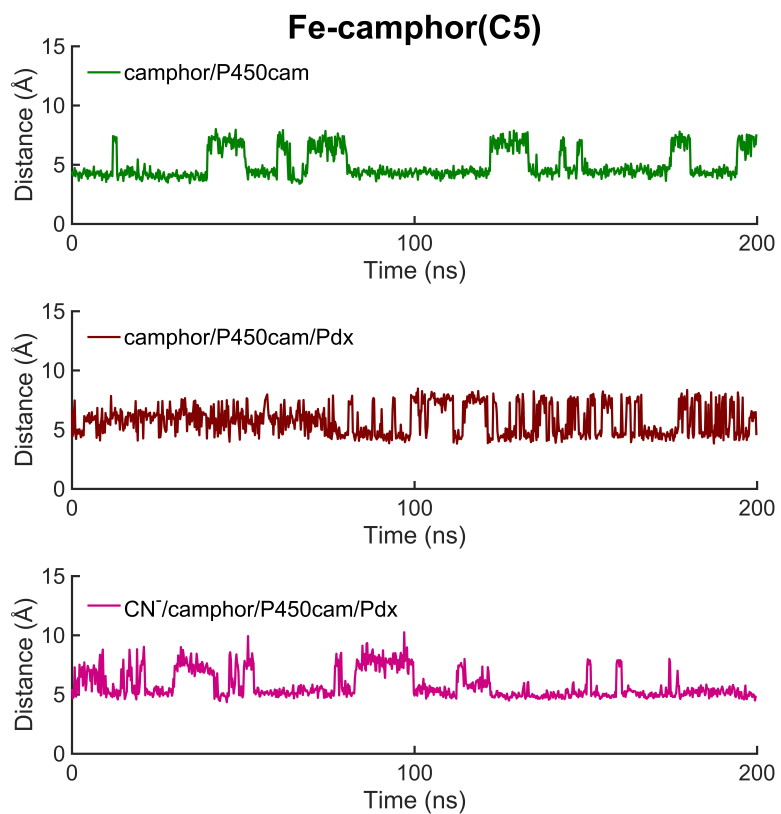

Figure S8: Time evolution from MD trajectories for the distance between heme iron and camphor C5 for camphor/P450cam (green), camphor/P450cam/Pdx (brown), and CN<sup>-</sup>/camphor/P450cam/Pdx (magenta) complexes.

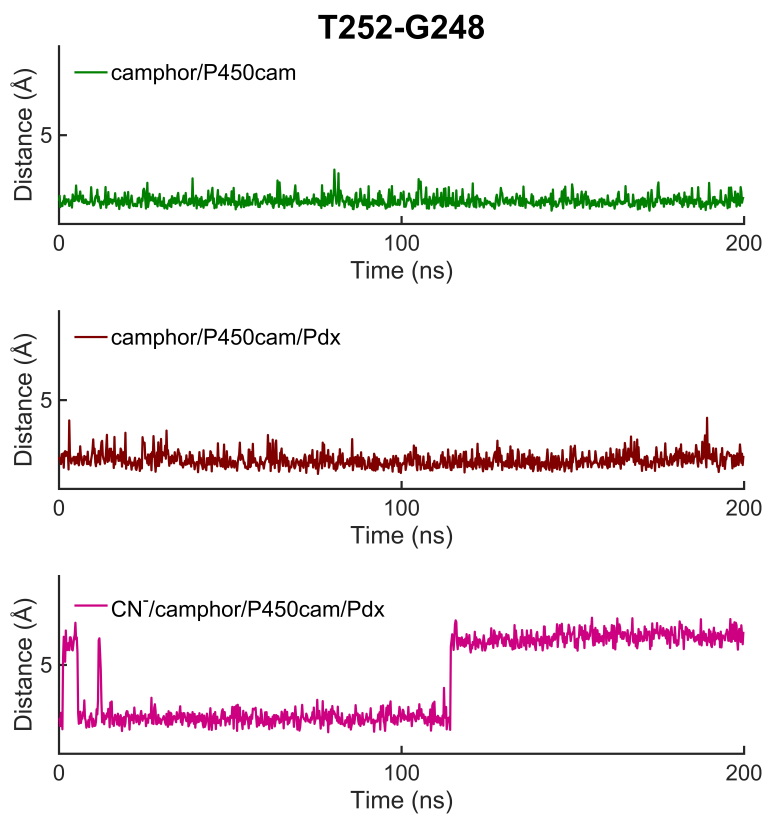

Figure S9: Time evolution from MD trajectories for the distance between the hydroxyl oxygen atom of Thr252 and the carbonyl oxygen atom of Gly248 for camphor/P450cam (green), camphor/P450cam/Pdx (brown), and CN<sup>-</sup>/camphor/P450cam/Pdx (magenta) complexes.

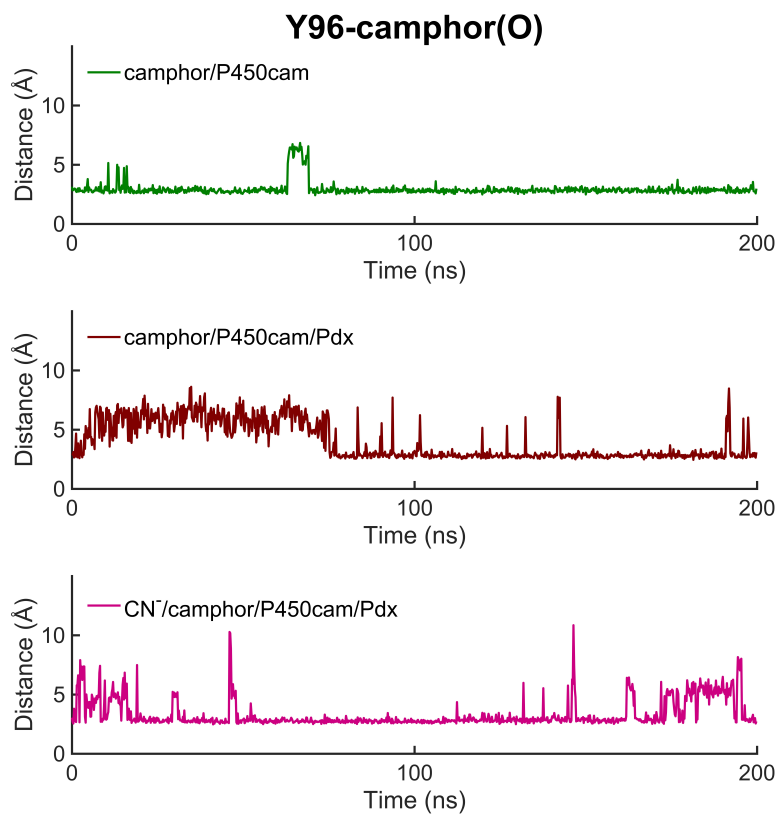

Figure S10: Time evolution from MD trajectories for the distance between the hydroxyl oxygen atom of Tyr97 and the carbonyl oxygen atom of camphor for camphor/P450cam (green), camphor/P450cam/Pdx (brown), and CN<sup>-</sup>/camphor/P450cam/Pdx (magenta) complexes.

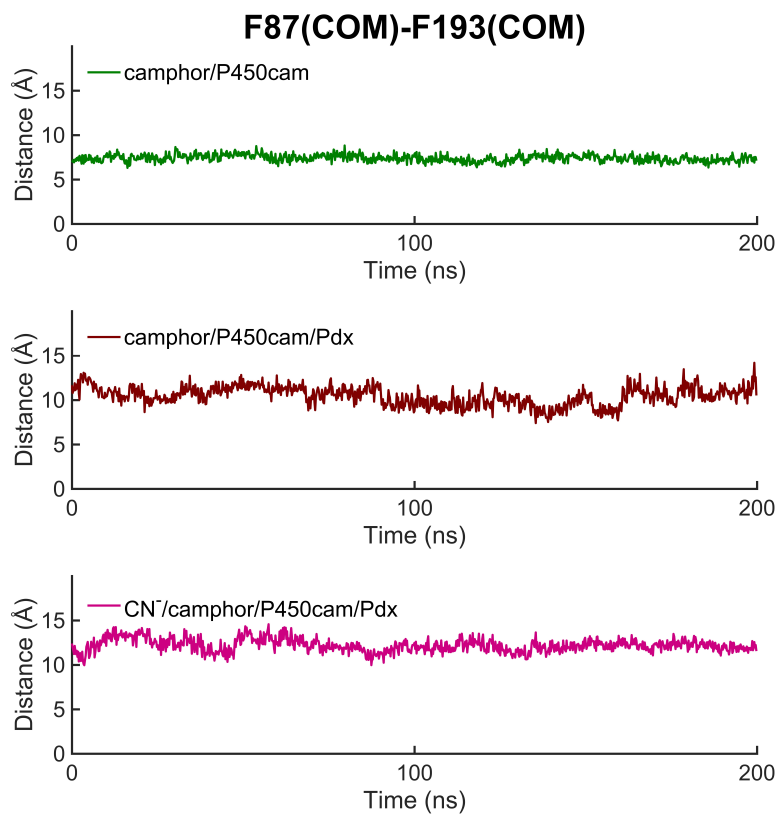

Figure S11: Time evolution from MD trajectories for the distance between the center of mass of Phe87 and Phe193 for camphor/P450cam (green), camphor/P450cam/Pdx (brown), and CN<sup>-</sup>/camphor/P450cam/Pdx (magenta) complexes.

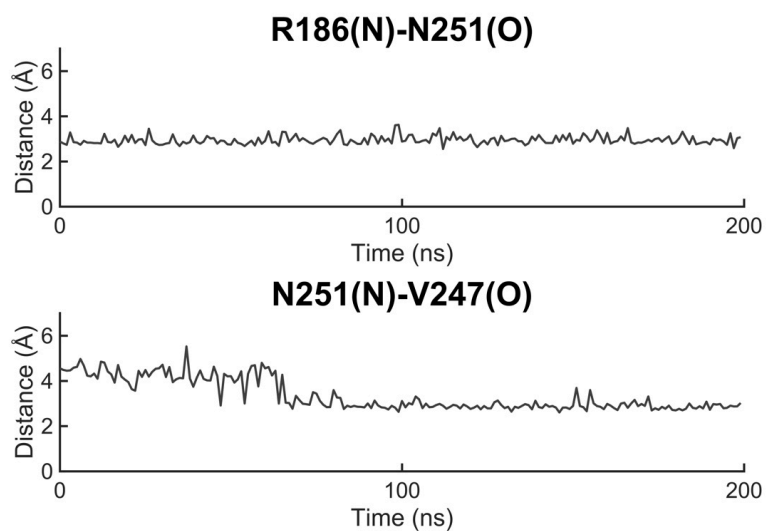

Figure S12: Time evolution from MD trajectories for the distance between Arg186 NH1 and Asn251 OD (top), and for the interaction between Val247 O and Asn251 ND2 (bottom) for  $\text{CN}^-$ /camphor/P450cam(D251N)/Pdx. For the first 80ns, Asn251 interacts only with Arg186. After 80ns, the Asn251 makes an additional interaction with Val247.

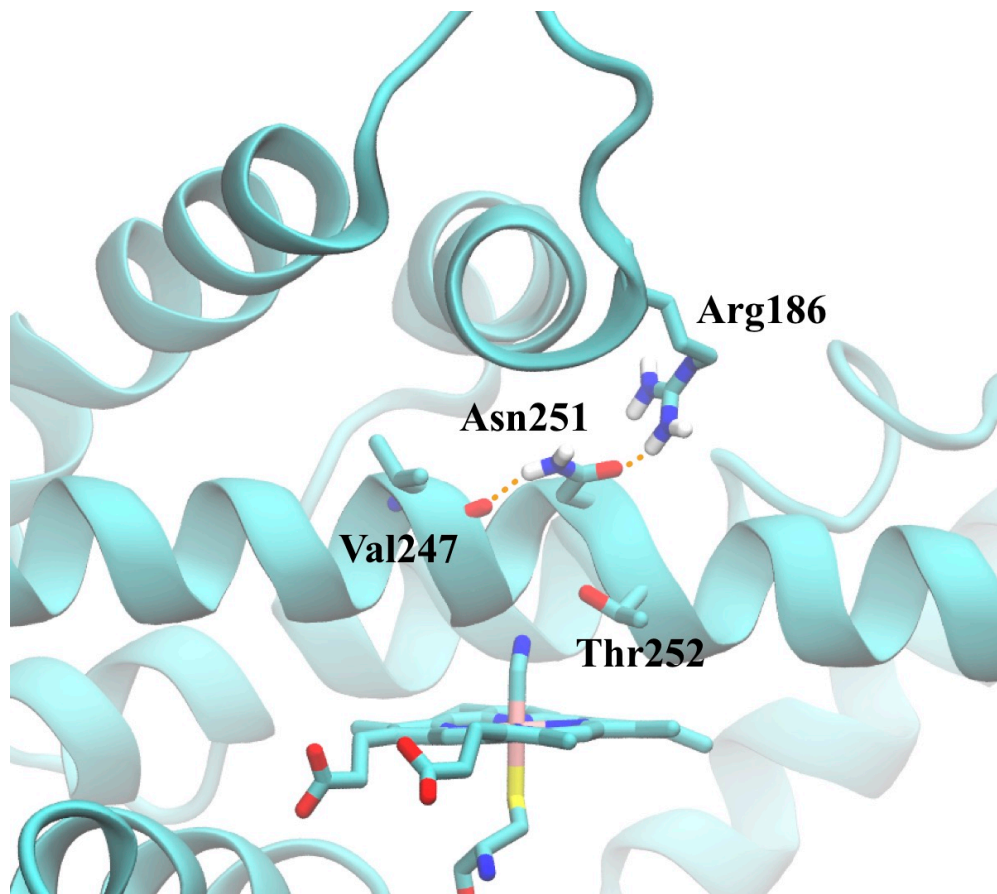

Figure S13: MD snapshot for the  $\text{CN}^-$ /camphor/P450cam(D251N)/Pdx complex corresponding to the alternative rotamer indicated in Figure S12.

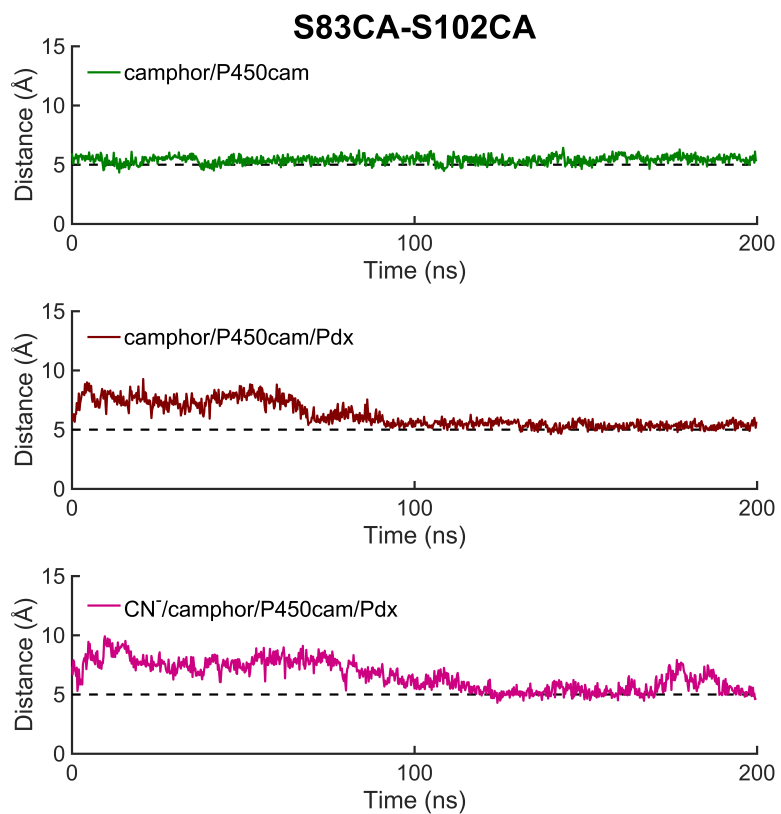

Figure S14: Time evolution from MD trajectories for the distance between Ser83 CA and Ser102 CA for camphor/P450cam (green), camphor/P450cam/Pdx (brown), and CN<sup>-</sup>/camphor/P450cam/Pdx (magenta) complexes.

Table S1: NADH consumption rate of P450cam.

| Enzyme                                  | NADH consumption rate ( $\mu\text{M}/\text{s}/\mu\text{M P450cam}$ ) |
|-----------------------------------------|----------------------------------------------------------------------|
| P450cam                                 | $9.96 \pm 0.57$                                                      |
| 4MT-labeled P450cam(C48S, Y179S)        | $8.36 \pm 0.38$                                                      |
| 4MT-labeled P450cam(C48S, Y179S, D251N) | $0.02 \pm 0.01$                                                      |

P450cam is cytochrome P450 from *Pseudomonas Putida* containing the mutations C334A, C58S, C85S, C136S, C285S.
